# Supplementary material
Source: PubMed Central journal article supplement (PMC2797570)
Supplement: NIHMS131217-supplement-01.pdf [file NIHMS131217-supplement-01.pdf]

## Supplemental Digital Content

Figure 1.

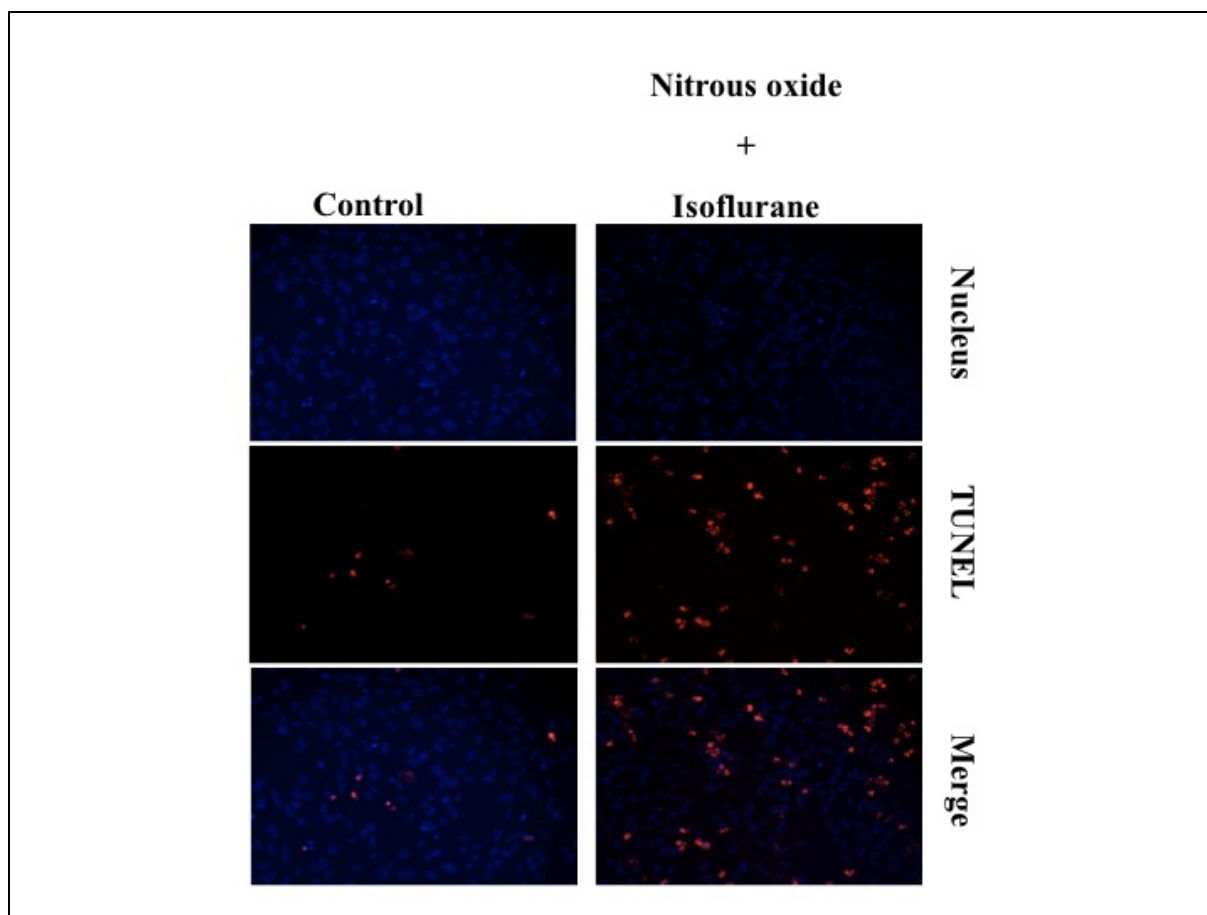

**Figure 1. Treatment of nitrous oxide plus isoflurane induces apoptosis in H4-APP cells.** Nitrous oxide plus isoflurane treatment increases TUNEL positive cells as compared to the control condition in H4-APP cells. TUNEL, Terminal deoxynucleotidyl transferase dUTP nick end labeling; APP, amyloid precursor protein.

**Figure 2.**

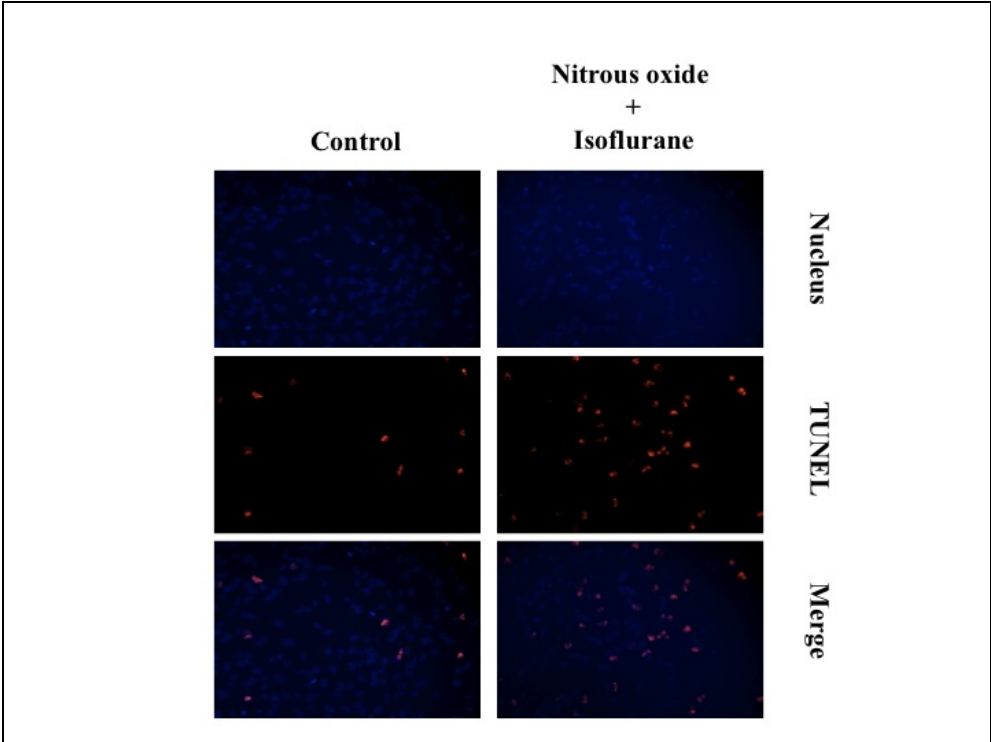

**Figure 2. Treatment of nitrous oxide plus isoflurane induces apoptosis in H4 naive cells.** Nitrous oxide plus isoflurane treatment increases TUNEL positive cells as compared to the control condition in H4 naive cells. TUNEL, Terminal deoxynucleotidyl transferase dUTP nick end labeling.

**Figure 3.**

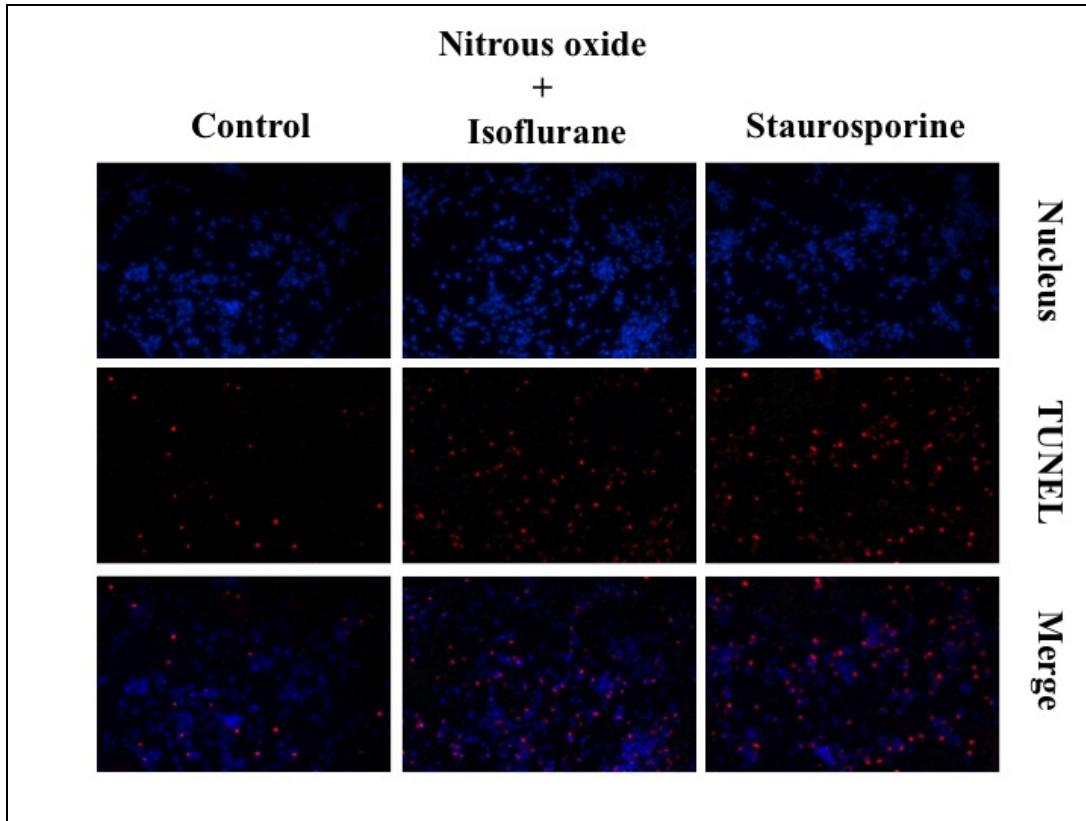

**Figure 3. Treatment of nitrous oxide plus isoflurane induces apoptosis in primary neurons from naïve mice.** Nitrous oxide plus isoflurane treatment increases TUNEL positive cells as compared to the control condition in primary neurons from naïve mice. As a positive control, staurosporine increases TUNEL positive cells as compared to the control condition in the primary neurons from naïve mice. TUNEL, Terminal deoxynucleotidyl transferase dUTP nick end labeling.
